# Supplementary material
Source: publisher figshare collection journal article supplement (https://sage.figshare.com/ndownloader/files/19793432)
Supplement: Supplementary file 1 [file 19793432]

## **Supplemental Materials**

Table S1  
*Changes in CRS Use Accuracy*

|                          | Caregivers with 1 or more<br>errors at baseline (%) | Caregivers with 1 or more<br>errors at post-intervention (%) |
|--------------------------|-----------------------------------------------------|--------------------------------------------------------------|
| Seat selection (n=142)   | 15                                                  | 8*                                                           |
| Installation (n=120)     | 85                                                  | 62*                                                          |
| Child positioning (n=77) | 57                                                  | 33                                                           |
| All domains (n=69)       | 88                                                  | 73*                                                          |

\*McNemar's test  $p < .05$  for significant decrease in error rate from baseline to post-intervention

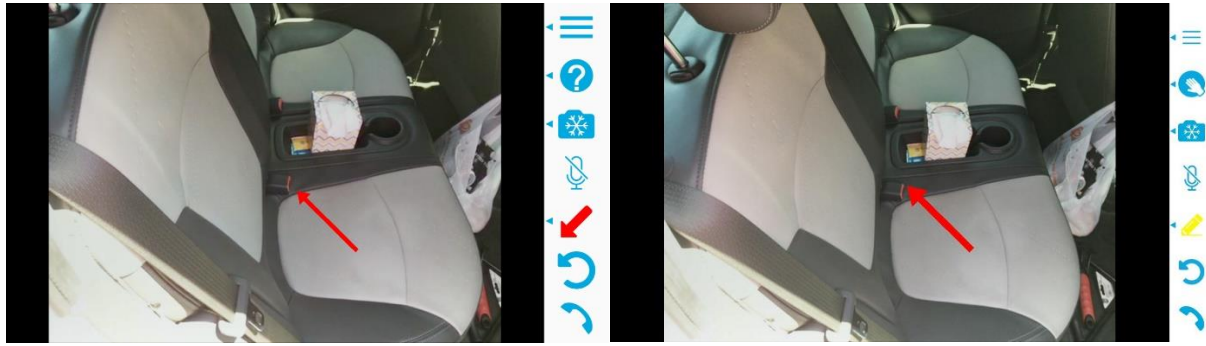

*Figure S1* Screen images of Help Lighting IVP app during remote CPST consultation. Left image displays CPST screen in “Give Help” mode using the real-time drawing feature. Right image displays caregiver screen in “Receive Help” mode.
